# Supplementary material
Source: PubMed Central journal article supplement (PMC7307840)
Supplement: am9b19955_si_001.pdf [file am9b19955_si_001.pdf]

## Supporting Information

# Multifunctional Carbon Aerogels with Hierarchical Anisotropic Structure Derived from Lignin and Cellulose Nanofibers for CO<sub>2</sub> Adsorption and Energy Storage

*Shiyu Geng,<sup>1\*</sup> Jiayuan Wei,<sup>1</sup> Simon Jonasson,<sup>1</sup> Jonas Hedlund,<sup>2</sup> Kristiina Oksman<sup>1,3,4\*</sup>*

<sup>1</sup>Division of Materials Science, Department of Engineering Sciences and Mathematics, Luleå University of Technology, SE-971 87, Luleå, Sweden

<sup>2</sup>Chemical Technology, Department of Civil, Environmental and Natural Resources Engineering, Luleå University of Technology, SE-97 187, Luleå, Sweden

<sup>3</sup>Fibre and Particle Engineering, University of Oulu, FI-90014, Oulu, Finland

<sup>4</sup>Mechanical & Industrial Engineering (MIE), University of Toronto, Toronto, ON, Canada, M5S 3G8

**Table S1.** Porosity and density of the LTCA.s.

| Sample coding | Porosity (%) | Density (g cm <sup>-3</sup> ) |
|---------------|--------------|-------------------------------|
| LTCA8         | 91.6         | 0.175                         |
| LTCA10        | 91.9         | 0.169                         |
| LTCA12        | 93.4         | 0.138                         |

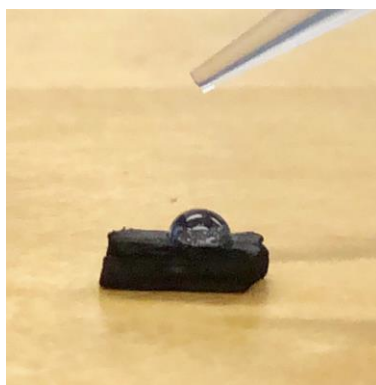

**Figure S1.** Contact angle demonstration in which one droplet of distilled water was deposited on the surface of LTCA12. The image was taken from the first second after the deposition.

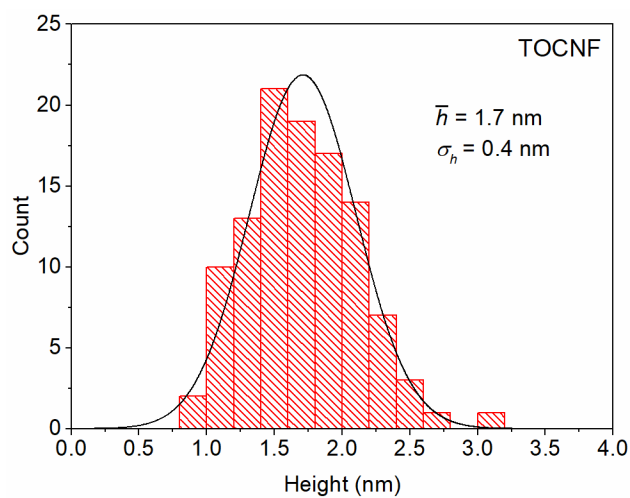

**Figure S2.** Histogram of the TOCNF width measured from AFM height images.

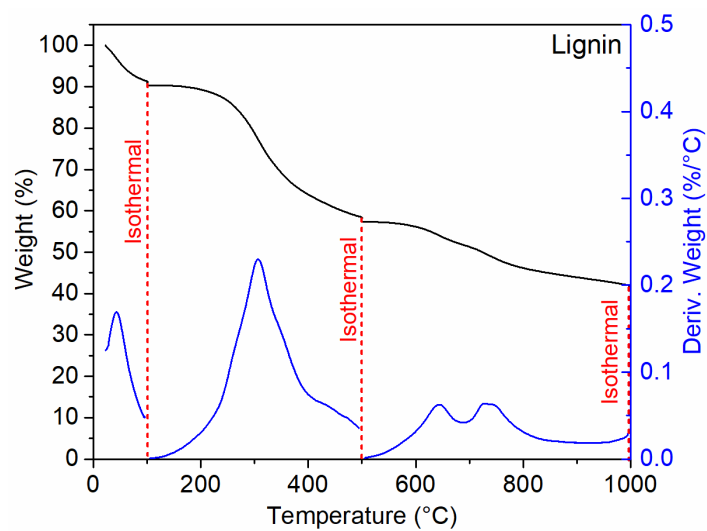

**Figure S3.** TGA curves of lignin used in this study.

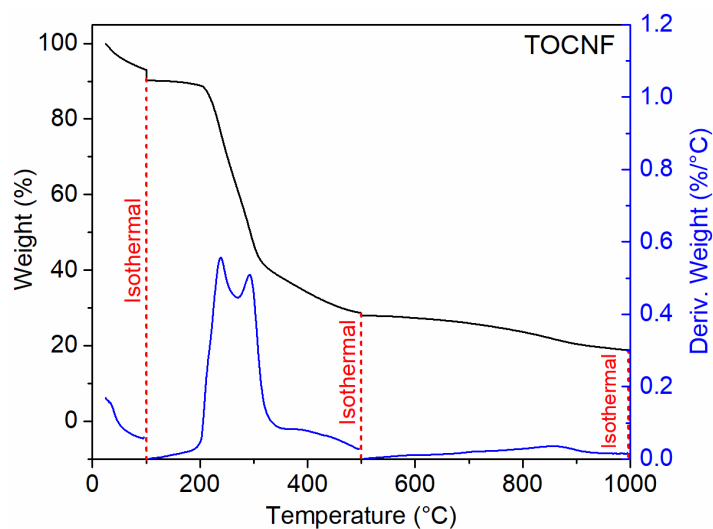

**Figure S4.** TGA curves of TOCNF used in this study.

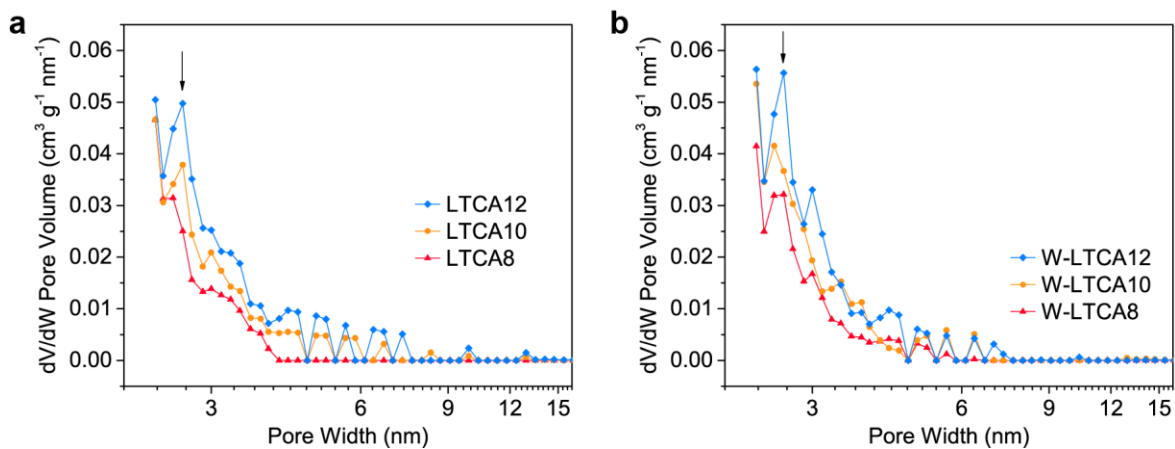

**Figure S5.** Pore size distribution of (a) LTCAs and (b) W-LTCAs calculated using non-local density functional theory (NLDFT) for N<sub>2</sub> adsorption at 77 K.

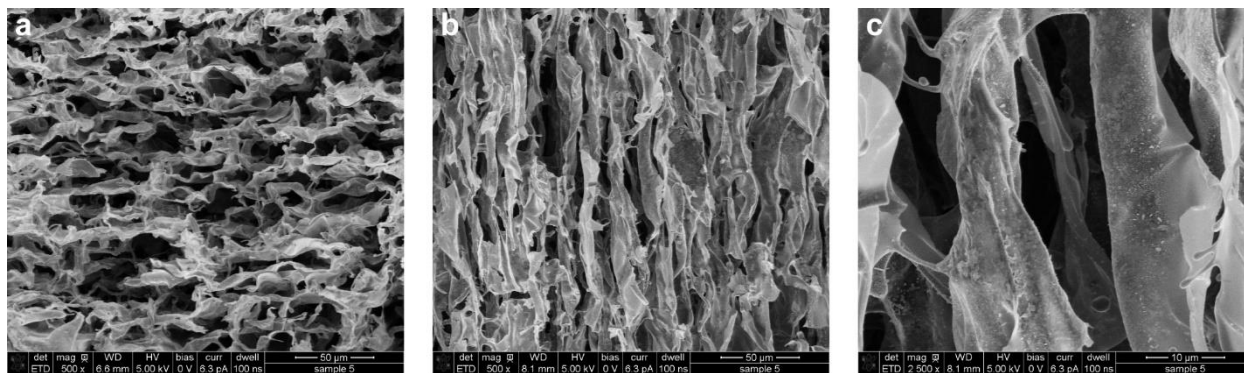

**Figure S6.** SEM images of LTCA8 from the (a) cross-section, (b) longitudinal section and (c) magnified view.

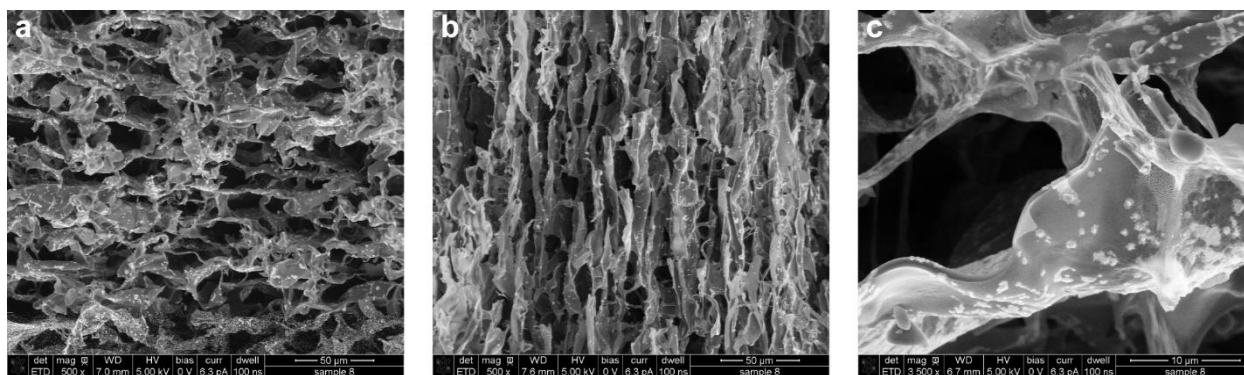

**Figure S7.** SEM images of LTCA10 from the (a) cross-section, (b) longitudinal section and (c) magnified view.

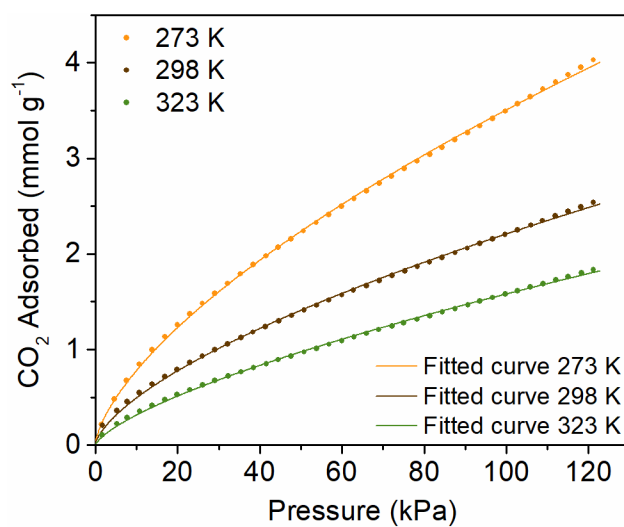

**Figure S8.** CO<sub>2</sub> adsorption isotherms of LTCA10 at different temperatures and the related Langmuir fitted curves.

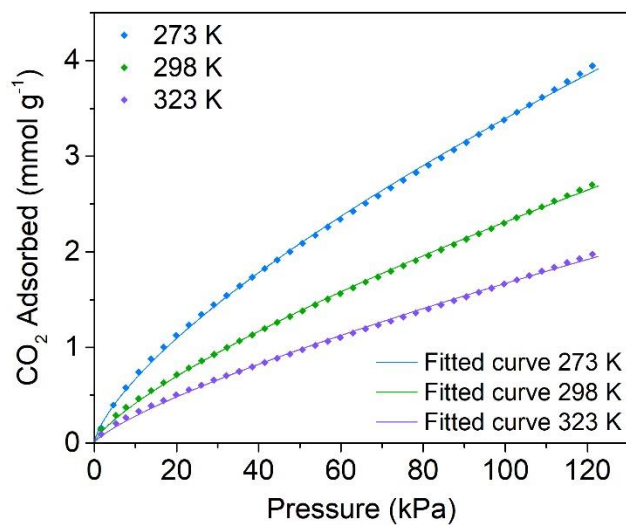

**Figure S9.** CO<sub>2</sub> adsorption isotherms of LTCA12 at different temperatures and the related Langmuir fitted curves.

**Table S2.** The data collected from the BET surface analysis.

| Sample   | BET surface area<br>(m <sup>2</sup> g <sup>-1</sup> ) | t-Plot micropore area<br>(m <sup>2</sup> g <sup>-1</sup> ) | Pore volume*<br>(cm <sup>3</sup> g <sup>-1</sup> ) | Pore size<br>(nm) |
|----------|-------------------------------------------------------|------------------------------------------------------------|----------------------------------------------------|-------------------|
| LTCA8    | 413                                                   | 289                                                        | 0.20                                               | 1.92              |
| LTCA10   | 704                                                   | 458                                                        | 0.34                                               | 1.93              |
| LTCA12   | 806                                                   | 487                                                        | 0.39                                               | 1.95              |
| W-LTCA8  | 617                                                   | 476                                                        | 0.27                                               | 1.72              |
| W-LTCA10 | 839                                                   | 542                                                        | 0.40                                               | 1.91              |
| W-LTCA12 | 1101                                                  | 638                                                        | 0.55                                               | 1.99              |

\*Total pore volume of the pores having the diameter less than 200 nm

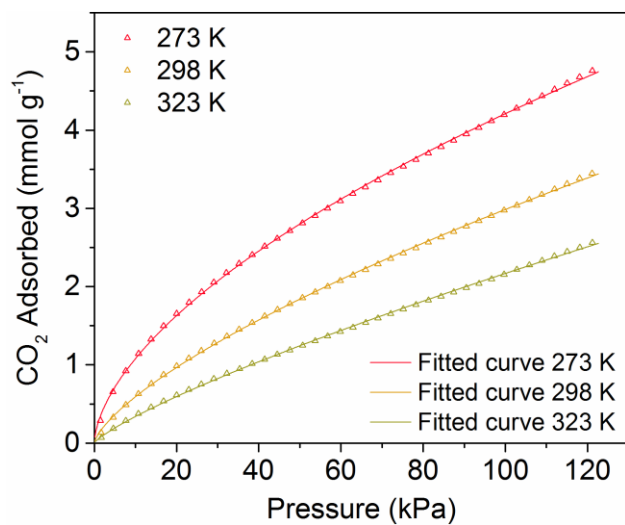

**Figure S10.** CO<sub>2</sub> adsorption isotherms of W-LTCA8 at different temperatures and the related Langmuir fitted curves.

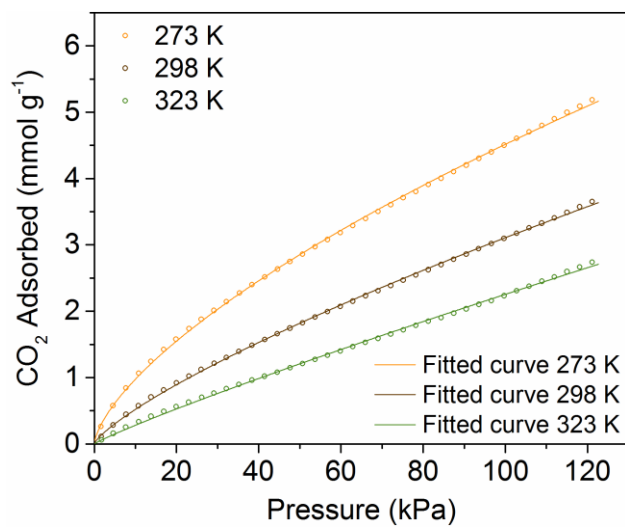

**Figure S11.** CO<sub>2</sub> adsorption isotherms of W-LTCA10 at different temperatures and the related Langmuir fitted curves.

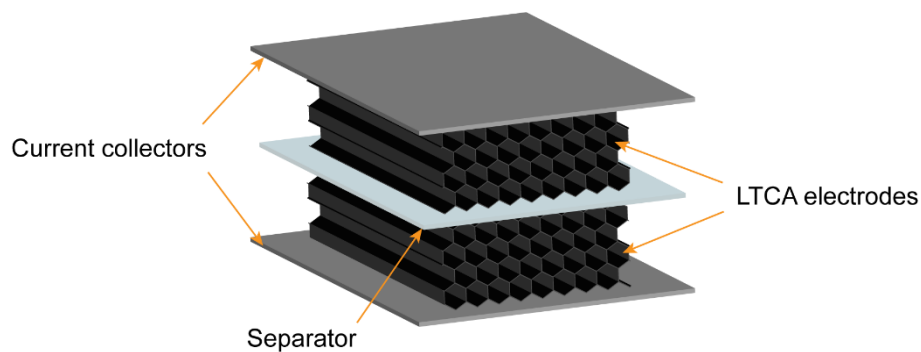

**Figure S12.** Schematic of the two-electrode setup used in the electrochemical tests.

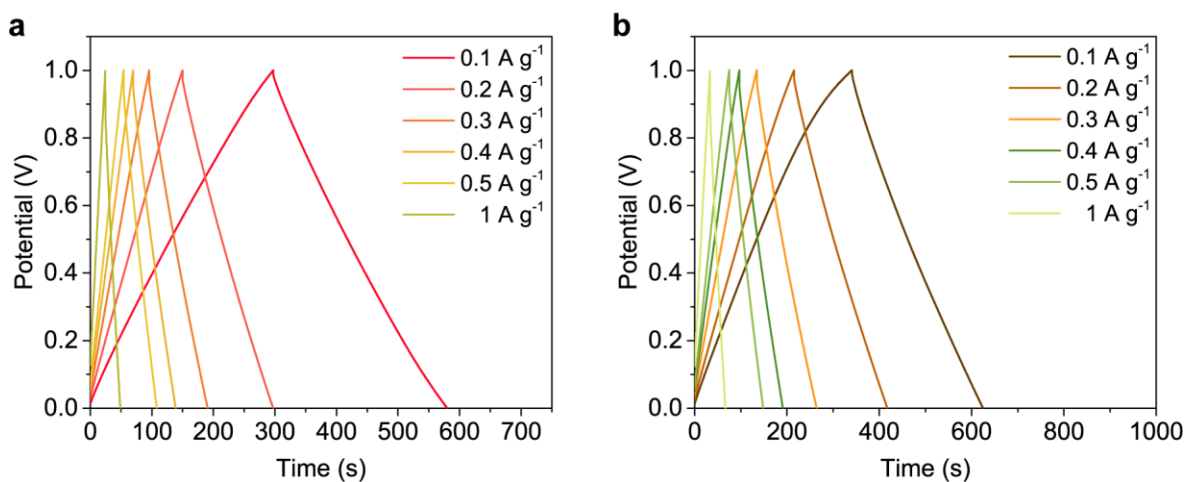

**Figure S13.** GCD curves of the SCs with (a) LTCA8 and (b) LTCA10 electrodes tested at different current densities.

**Table S3.** Electrochemical properties of the SCs with LTCA electrodes.

| Sample | Current density      |                        | $C_g$<br>(F g <sup>-1</sup> ) | $C_{cell}^*$<br>(F g <sup>-1</sup> ) | $C_a$<br>(F cm <sup>-2</sup> ) | $E_d$<br>(Wh kg <sup>-1</sup> ) | $P_d$<br>(W kg <sup>-1</sup> ) |
|--------|----------------------|------------------------|-------------------------------|--------------------------------------|--------------------------------|---------------------------------|--------------------------------|
|        | (A g <sup>-1</sup> ) | (mA cm <sup>-2</sup> ) |                               |                                      |                                |                                 |                                |
| LTCA8  | 0.1                  | 3.1                    | 113.2                         | 28.3                                 | 1.74                           | 3.93                            | 50                             |
|        | 0.2                  | 6.1                    | 110.0                         | 27.5                                 | 1.69                           | 3.82                            | 100                            |
|        | 0.3                  | 9.2                    | 106.4                         | 26.6                                 | 1.63                           | 3.69                            | 150                            |



|        |     |       |       |      |      |      |      |
|--------|-----|-------|-------|------|------|------|------|
|        | 0.4 | 12.3  | 103.5 | 25.9 | 1.59 | 3.59 | 200  |
|        | 0.5 | 15.3  | 100.9 | 25.2 | 1.55 | 3.50 | 250  |
|        | 1   | 30.7  | 91.1  | 22.8 | 1.40 | 3.16 | 500  |
|        | 2   | 61.4  | 76.4  | 19.1 | 1.17 | 2.65 | 1000 |
|        | 3   | 92.1  | 56.0  | 14.0 | 0.86 | 1.94 | 1500 |
|        | 4   | 122.8 | 42.7  | 10.7 | 0.65 | 1.48 | 2000 |
|        | 5   | 153.5 | 31.1  | 7.8  | 0.48 | 1.08 | 2500 |
| LTCA10 | 0.1 | 3.0   | 113.5 | 28.4 | 1.71 | 3.94 | 50   |
|        | 0.2 | 6.0   | 113.3 | 28.3 | 1.71 | 3.93 | 100  |
|        | 0.3 | 9.0   | 108.8 | 27.2 | 1.64 | 3.78 | 150  |
|        | 0.4 | 12.1  | 105.6 | 26.4 | 1.59 | 3.67 | 200  |
|        | 0.5 | 15.1  | 102.9 | 25.7 | 1.55 | 3.57 | 250  |
|        | 1   | 30.1  | 93.2  | 23.3 | 1.41 | 3.24 | 500  |
|        | 2   | 60.3  | 77.1  | 19.3 | 1.16 | 2.68 | 1000 |
| LTCA12 | 0.1 | 1.9   | 123.4 | 30.8 | 1.20 | 4.28 | 50   |
|        | 0.2 | 3.9   | 124.4 | 31.1 | 1.21 | 4.32 | 100  |
|        | 0.3 | 5.8   | 120.7 | 30.2 | 1.18 | 4.19 | 150  |
|        | 0.4 | 7.8   | 119.9 | 30.0 | 1.17 | 4.16 | 200  |
|        | 0.5 | 9.7   | 118.1 | 29.5 | 1.15 | 4.10 | 250  |
|        | 1   | 19.5  | 111.8 | 27.9 | 1.09 | 3.88 | 500  |
|        | 2   | 39.0  | 100.5 | 25.1 | 0.98 | 3.49 | 1000 |
|        | 3   | 58.4  | 92.3  | 23.1 | 0.90 | 3.20 | 1500 |
|        | 4   | 77.9  | 85.5  | 21.4 | 0.83 | 2.97 | 2000 |
|        | 5   | 97.4  | 80.6  | 20.2 | 0.79 | 2.80 | 2500 |

\*Cell capacitance ( $C_{cell}$ ) of the SCs was calculated using:

$$C_{cell} = \frac{I \cdot \Delta t}{\Delta V \cdot m} = C_g/4 \quad \text{Eq. S1}$$
